# Supplementary material for: An efficient and novel approach for the synthesis of substituted N-aryl lactams
Source: Royal Society of Chemistry journal article supplement (doi:10.1039/c2ob26230d), 2012-01-01
Supplement: c2ob26230d.pdf [file c2ob26230d.pdf]

Expression of Concern for *Organic & Biomolecular Chemistry*

**An efficient and novel approach for the synthesis of substituted *N*-aryl lactams**

Devdutt Chaturvedi, Amit K. Chaturvedi, Nisha Mishra and Virendra Mishra *Org. Biomol. Chem.*, 2012, **10**, 9148-9151 (DOI: 10.1039/C2OB26230D)

This article has been published in *Organic & Biomolecular Chemistry* and reports the synthesis of substituted *N*-aryl lactams through the reaction of substituted arenes with  $\omega$ -azido alkanonic acid chlorides, using a Lewis acid.

*Organic & Biomolecular Chemistry* is publishing this Expression of Concern in order to alert our readers to the fact that we have received significant concerns from members of the community regarding the data presented in this article as Table 1, including its similarity with data published in the following article by the same authors: *Synlett* 2012; 23(18): 2627-2630 as Table 1. In addition, significant concerns have been raised regarding the similarity of large parts of the text with text in *Synlett* 2012; 23(18): 2627-2630.

We have asked the institution of the corresponding author to carry out an investigation. This Expression of Concern will continue to be associated with the article until the investigation into this matter has been concluded.

Richard Kelly

11<sup>th</sup> December 2013

Managing Editor, *Organic & Biomolecular Chemistry*
